# Supplementary material for: Enhanced Herbicidal Action of Clopyralid in the Form of a Supramolecular Complex with a Gemini Surfactant
Source: MDPI journal article supplement (doi:10.3390/agronomy13040973), 2023-03-25
Supplement: s1 [file s1]

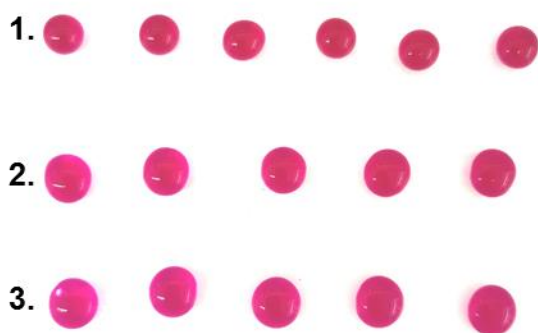

**Figure S1.** Spreading of a drop on Parafilm: 1 – clopyralid 0.03%; 2 – 16-6-16 0.01%; 3 – 16-6-16 0.01% + clopyralid 0.03%.

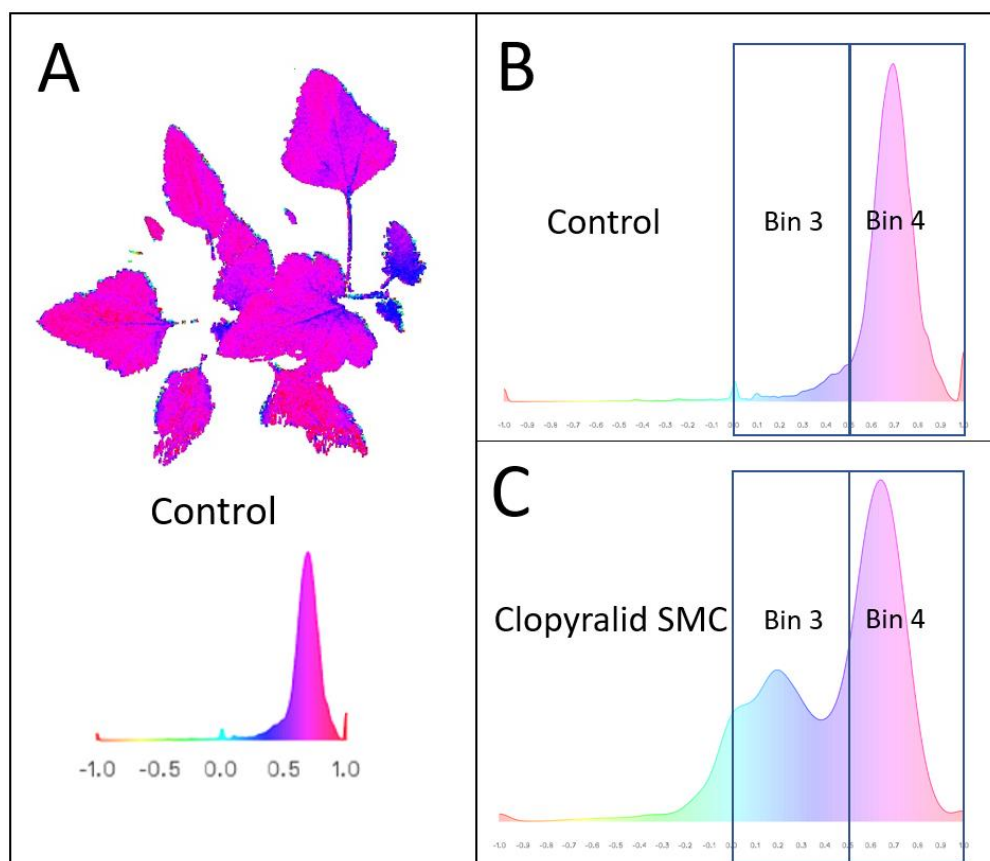

**Figure S2.** Distribution of NDVI (Normalized Difference Vegetation Index) values by points in 3D models of scanned cocklebur plants at the end of the experiment (day 12 from herbicide application). (A) Control cocklebur plant: top view of a 3D model of a plant, painted in pseudo-colors corresponding to the NDVI value and a scale of pseudo-colors in the form of a graph of the frequency of occurrence of various NDVI values. (B) Detailed graph of the frequency of occurrence of NDVI values in a Control cocklebur plant with borders of bin 3 (NDVI value range from 0 to 0.5) and bin

4 (NDVI value range from 0.5 to 1). (C) Detailed graph of the frequency of occurrence of NDVI values in a cocklebur plant treated by Clopyralid SMC with borders of bin 3 (NDVI value range from 0 to 0.5) and bin 4 (NDVI value range from 0.5 to 1).

Plant areas with NDVI values that fall into bin 3 (from 0 to 0.5) have a reduced chlorophyll content and considered unhealthy. Plant areas with NDVI values that fall into bin 4 (from 0.5 to 1) have normal chlorophyll content and considered healthy.

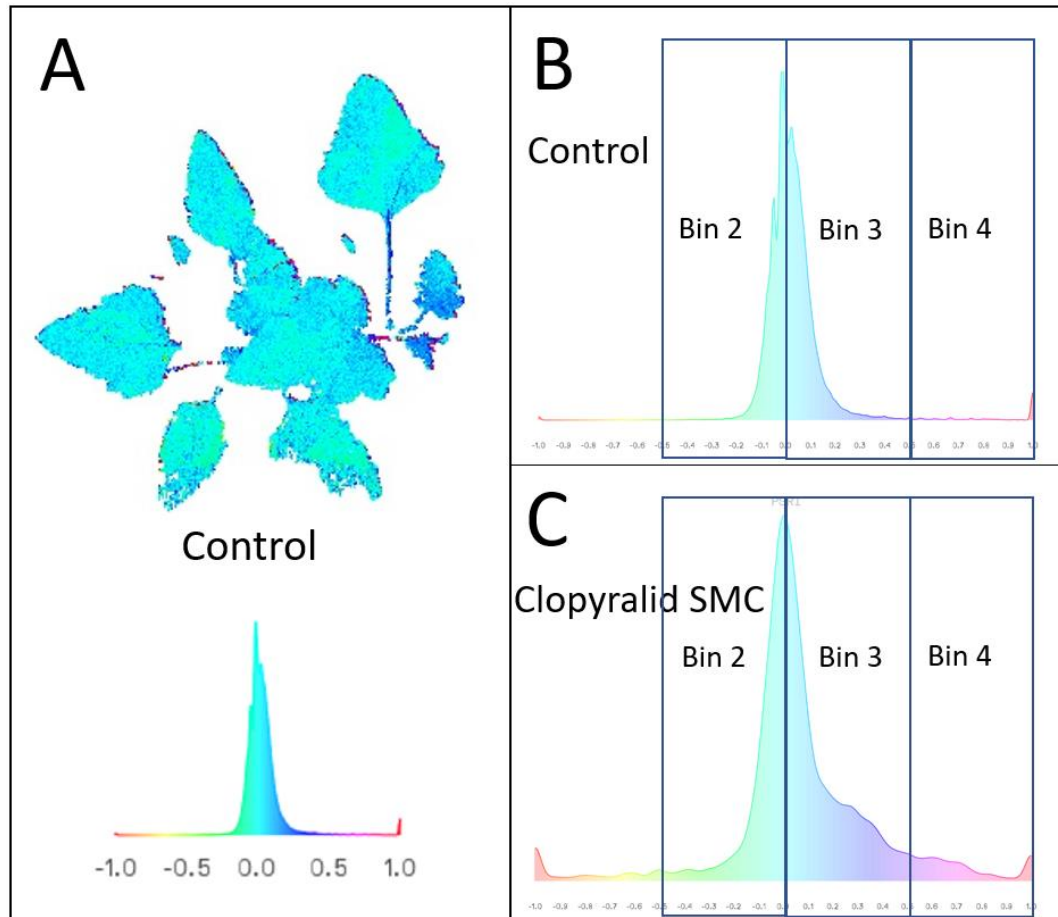

**Figure S3.** Distribution of PSRI (Plant Senescence Reflectance Index) values by points in 3D models of scanned cocklebur plants at the end of the experiment (day 12 from herbicide application). (A) Control cocklebur plant: top view of a 3D model of a plant, painted in pseudo-colors corresponding to the PSRI value and a scale of pseudo-colors in the form of a graph of the frequency of occurrence of various PSRI values. (B) Detailed graph of the frequency of occurrence of PSRI values in a Control cocklebur plant with borders of bin 2 (PSRI value range from -0.5 to 0), bin 3 (PSRI value range from 0 to 0.5) and bin 4 (PSRI value range from 0.5 to 1). (C) Detailed graph of the frequency of occurrence of PSRI values in a cocklebur plant treated by Clopyralid SMC with borders of bin 2 (PSRI value range from -0.5 to 1), bin 3 (PSRI value range from 0 to 0.5) and bin 4 (PSRI value range from 0.5 to 1).

Plant areas with PSRI values that fall into bin 2 (from -0.5 to 0) are considered healthy. PSRI values that fall into bin 3 (from 0 to 0.5) are characteristic partly for healthy plants (PSRI from 0 to 0.2) and partly for plants with some degree of

senescence (PSRI from 0.2 to 0.5). Plant areas with PSRI values that fall into bin 4 (from 0.5 to 1) are considered as senescent.
